# Supplementary material
Source: HighWire-hosted journal article supplement (http://d2538ggaoe6cji.cloudfront.net/highwire/filestream/46328/field_highwire_adjunct_files/2/154369-3.pdf)
Supplement: 154369-3.pdf [file 154369-3.pdf]

1 **Figure 2-figure supplement 3**

GREAT Analysis: TnT-specific enhancers

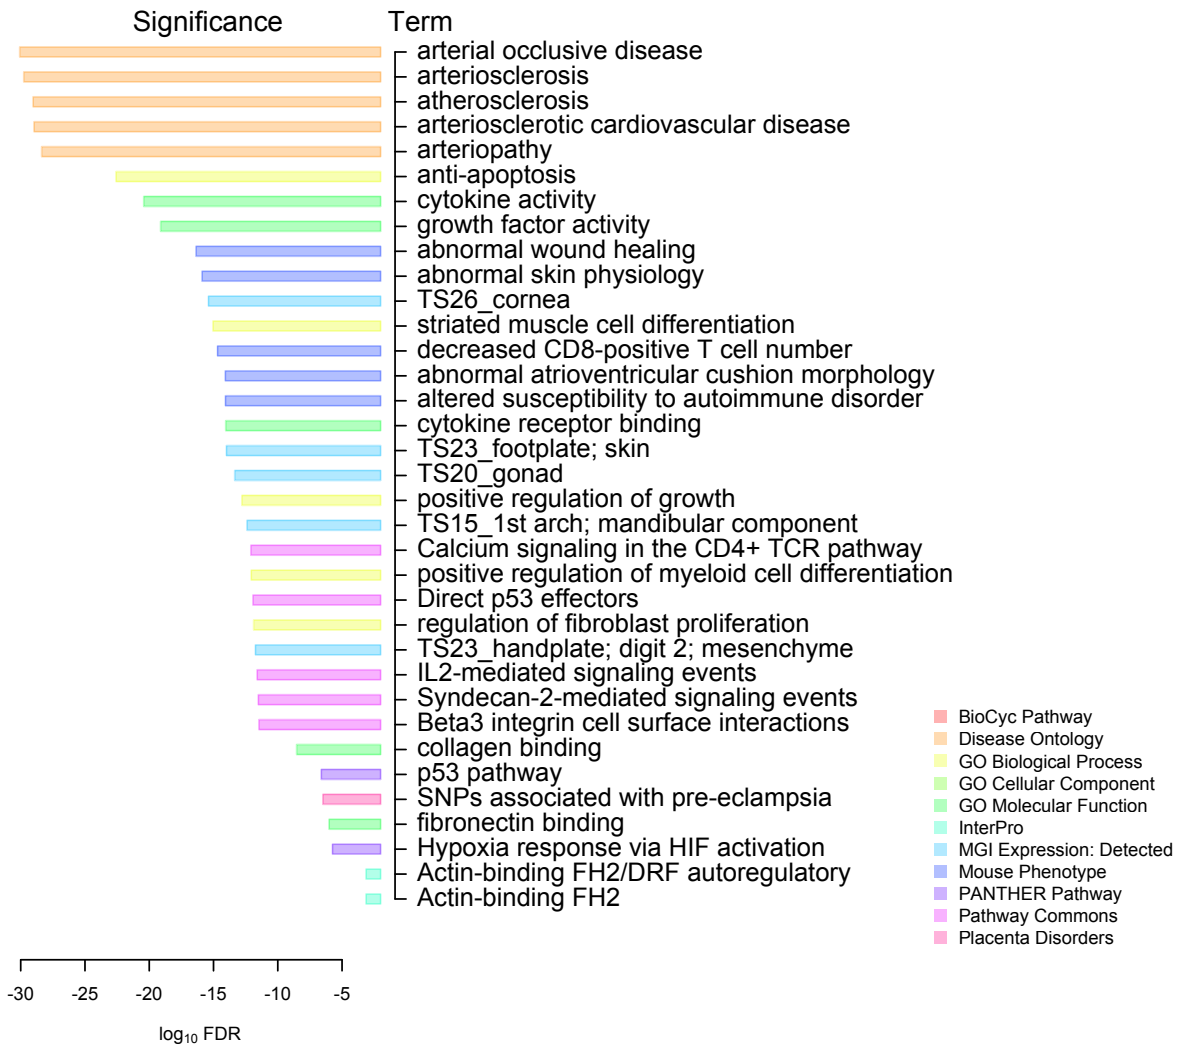

2  
3 **Figure 2-figure supplement 3.**  
4 **Functional annotation of genes near putative enhancers present exclusively in RPE exposed**  
5 **to TGFβ and TNFα and not in control cobblestone RPE.**

6 The top over-represented categories belonging to the different ontologies are shown in the  
7 lower right legend. GO = Gene ontology, MGI = Mouse Genome Informatics. The x axes values  
8 correspond to the log<sub>10</sub> of false discovery rate.

9
